# Supplementary material
Source: Springer Nature journal article supplement (https://www.springermedizin.de/resource/supplementary/12967_2014_1908_MOESM4_ESM.pdf/9575118)

A

A20

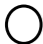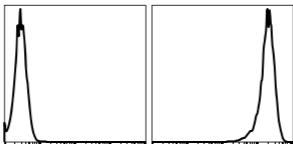A20:  
VH1-69/V $\kappa$ 3-20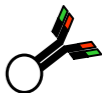A20: V $\kappa$ 3-20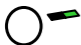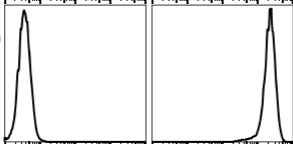

A20: VH1-69

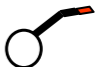

TIB149 (IgD)

B

1 2 3 4 5 6 1 2 3 4 5 6

500 bps

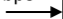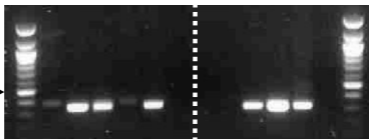

VH1-69

V $\kappa$ 3-20

Supplement: MOESM4 [file 9575118]
